# Supplementary material for: Fine‐needle aspiration as an alternative to core needle biopsy for tumour molecular profiling in precision oncology: prospective comparative study of next‐generation sequencing in cancer patients included in the SHIVA02 trial
Source: PubMed Central journal article supplement (PMC7782085; doi:10.1002/1878-0261.12776), 2020-09-15

Figure S4

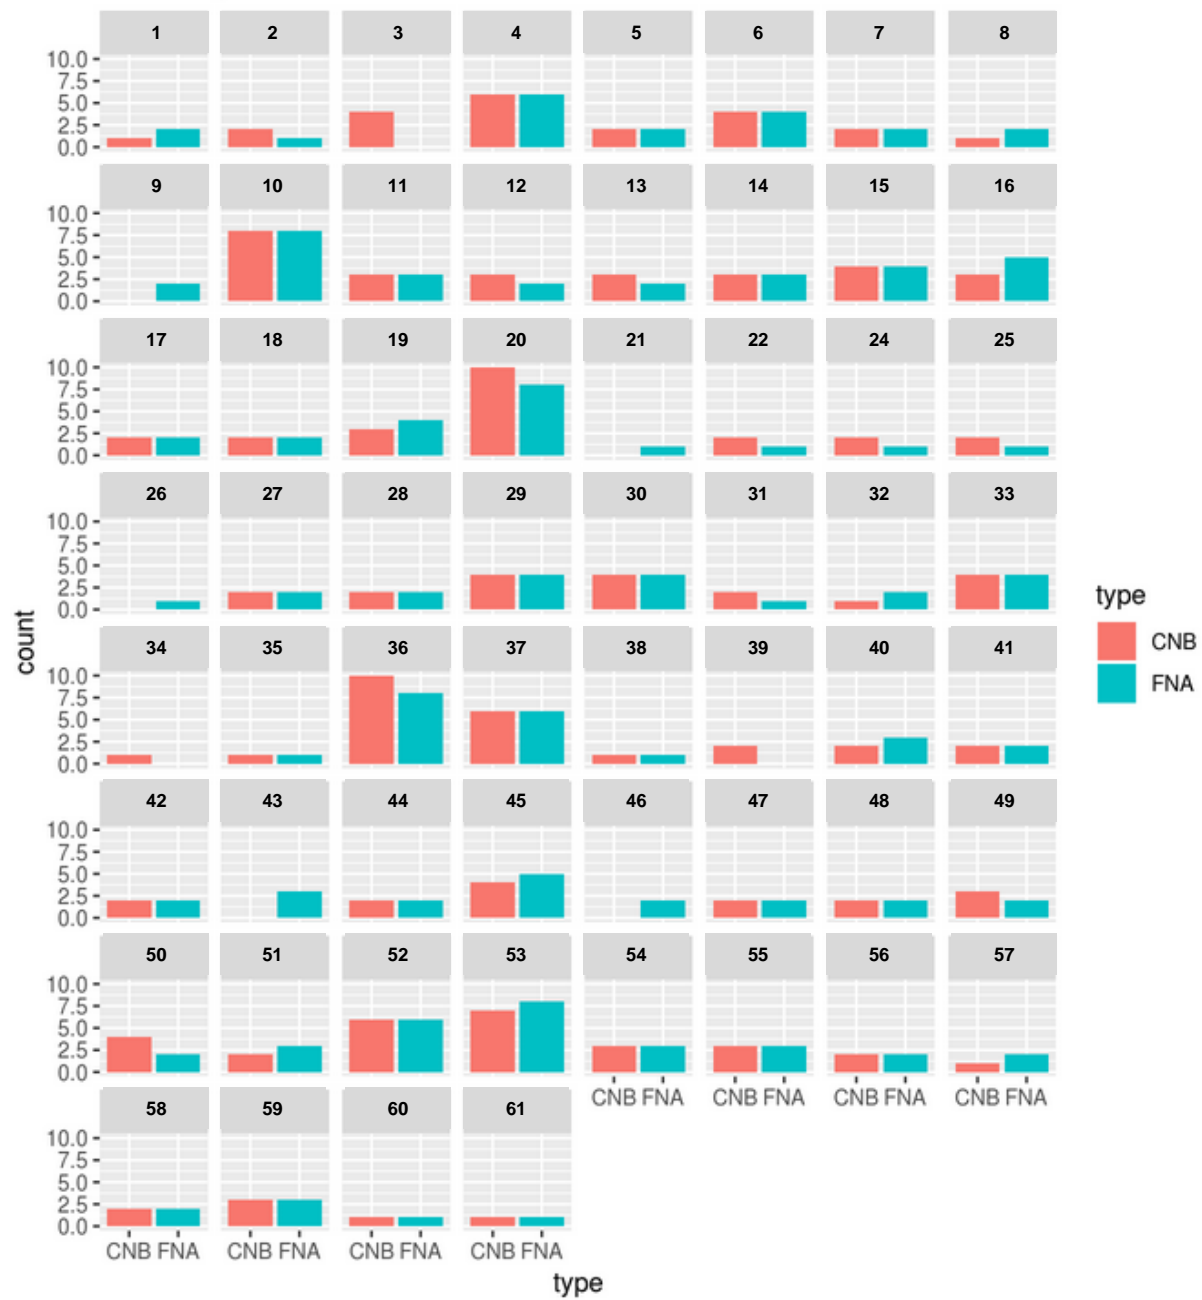

Supplement: MOL2-15-104-s004.pdf [file MOL2-15-104-s004.pdf]
